# Supplementary material for: Large-scale production of fine-sized Zn2SiO4:Mn phosphor microspheres with a dense structure and good photoluminescence properties by a spray-drying process
Source: Royal Society of Chemistry journal article supplement (doi:10.1039/c4ra06903j), 2014-09-05
Supplement: c4ra06903j1.pdf [file c4ra06903j1.pdf]

## Supporting Information

### Large-scale production of fine-sized $\text{Zn}_2\text{SiO}_4\text{:Mn}$ phosphor microspheres with dense structure and high photoluminescence property by spray-drying process

*Jung Sang Cho<sup>a</sup>, Su Min Lee<sup>b</sup>, Kyeong Youl Jung<sup>c</sup>, Yun Chan Kang<sup>a,\*</sup>*

*<sup>a</sup>Department of Materials Science and Engineering, Korea University, Anam-dong, Seongbuk-gu, Seoul 136-713, Republic of Korea*

*E-mail: [yckang@korea.ac.kr](mailto:yckang@korea.ac.kr), Fax: (+82) 2-928-3584*

*<sup>b</sup>Department of Chemical Engineering, Konkuk University, 1 Hwayang-dong, Gwangjin-gu, Seoul 143-701, Republic of Korea*

*<sup>c</sup>Department of Chemical Engineering, Kongju National University, 275 Buda-dong, Cheonan, Chungnam 330-717, Republic of Korea*

Keywords: luminescence, phosphor, gas-phase reaction, ceramics, spray drying

#### **This file includes:**

- Particle size distributions of the post-treated  $\text{Zn}_2\text{SiO}_4\text{:Mn}$  phosphor powders obtained from the solutions (a) without organic additive, (b) with CA, and (c) with dextrin.
- $\text{N}_2$  adsorption-desorption isotherms measured at 77 K for the post-treated  $\text{Zn}_2\text{SiO}_4\text{:Mn}$  powders prepared from the spray solutions without organic additive, and with CA, sucrose, and dextrin.
- XRD patterns of the post-treated  $\text{Zn}_2\text{SiO}_4\text{:Mn}$  powders prepared from the solutions with different concentration of dextrin.
- Formation mechanism of solid, hollow, and nano-sized  $\text{Zn}_2\text{SiO}_4\text{:Mn}$  powders prepared from the solutions with different concentration of dextrin.
- Schematic diagram and digital photo of spray dryer applied in the preparation of precursor powders.

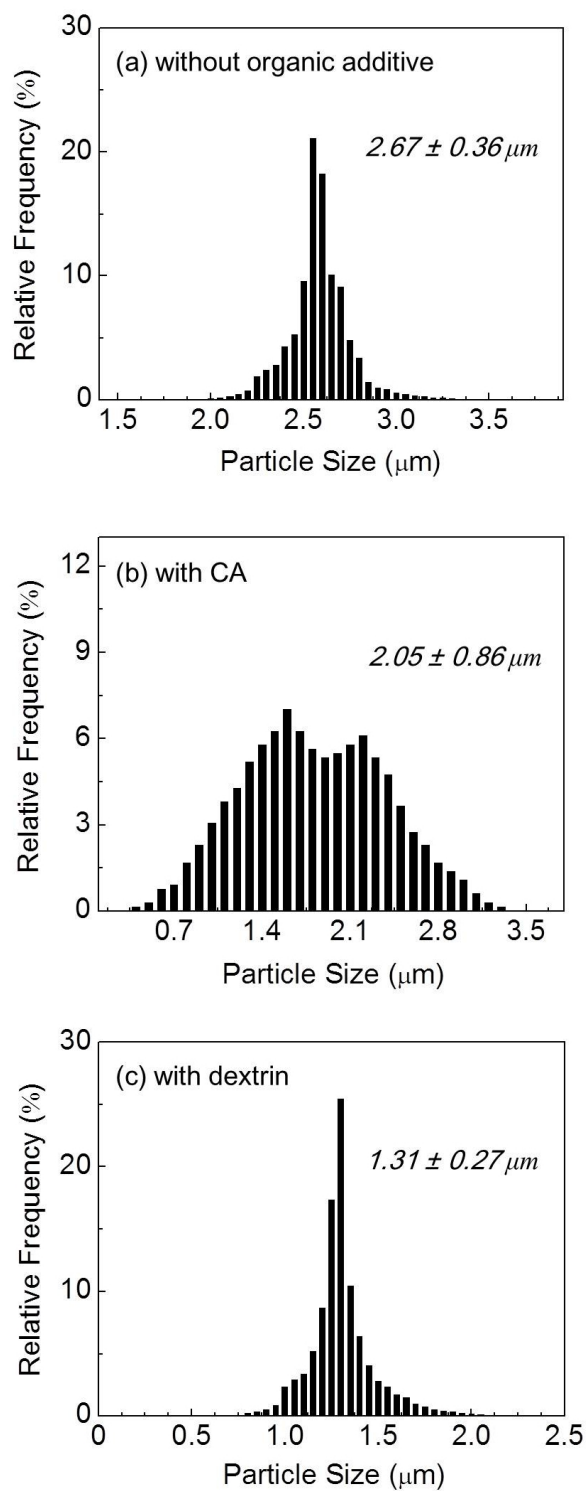

**Figure S1.** Particle size distributions of the post-treated  $\text{Zn}_2\text{SiO}_4:\text{Mn}$  phosphor powders obtained from the spray solutions (a) without organic additive, (b) with CA, and (c) with dextrin.

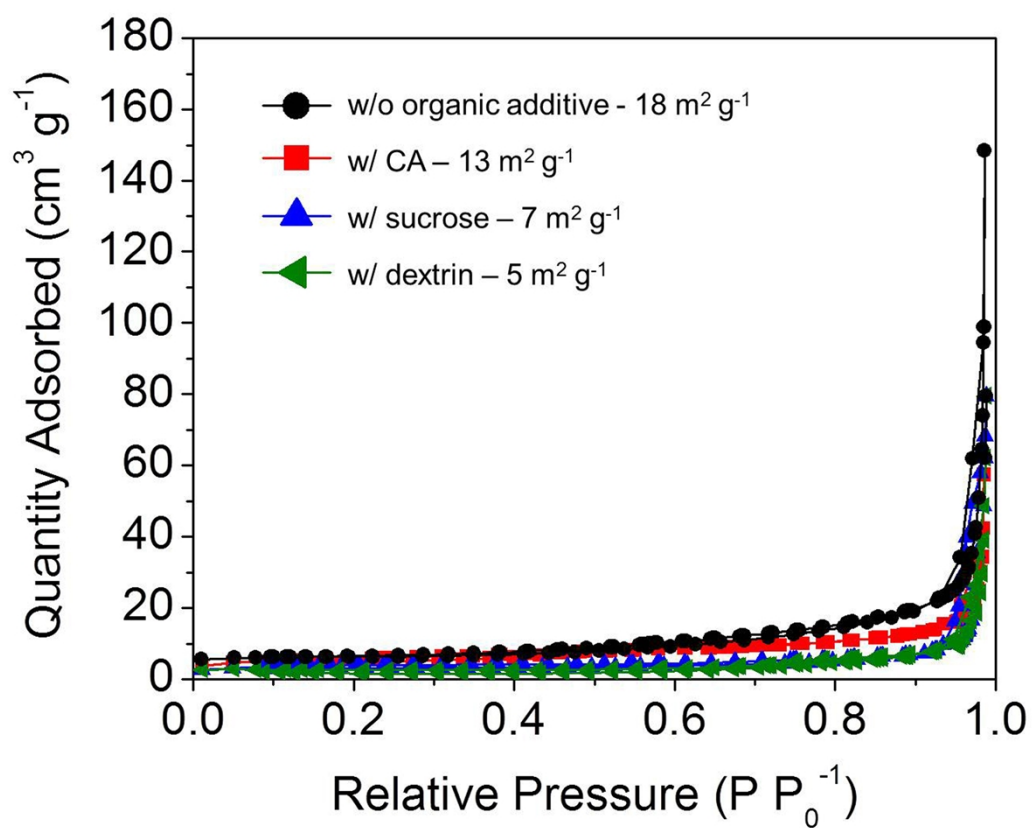

**Figure S2.** N<sub>2</sub> adsorption-desorption isotherms measured at 77 K for the post-treated Zn<sub>2</sub>SiO<sub>4</sub>:Mn powders prepared from the spray solutions without organic additive, and with CA, sucrose, and dextrin.

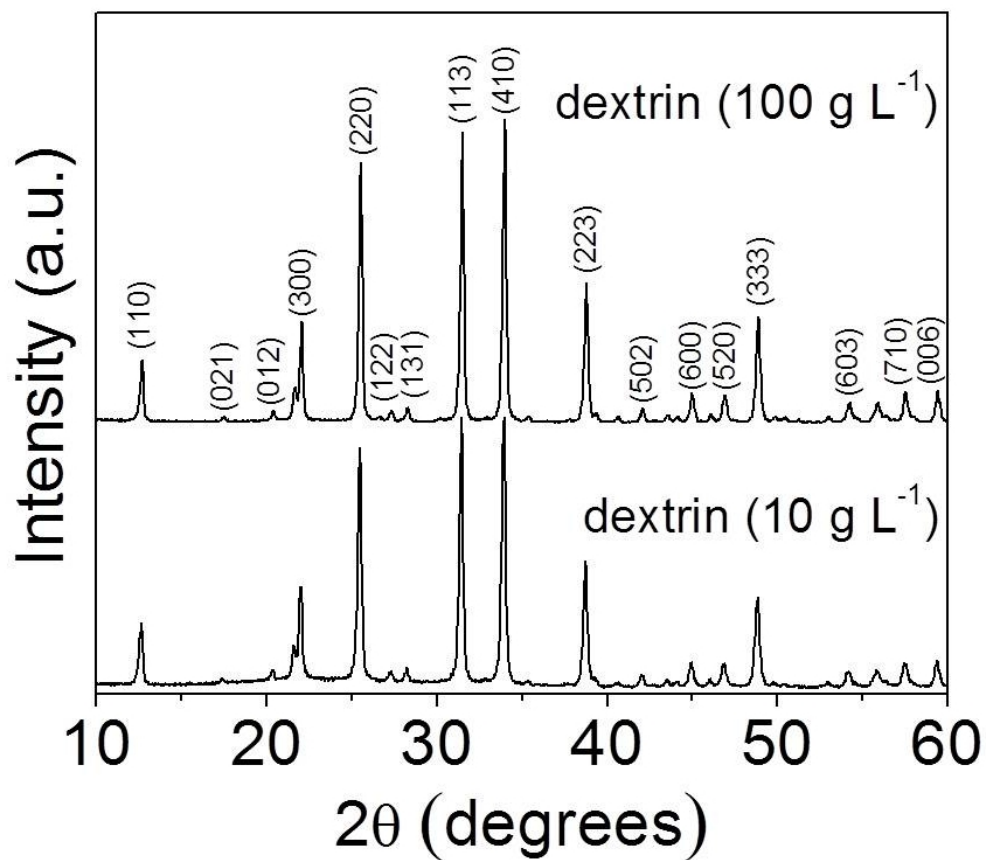

**Figure S3.** XRD patterns of the post-treated  $\text{Zn}_2\text{SiO}_4:\text{Mn}$  powders prepared from the solutions with different concentration of dextrin.

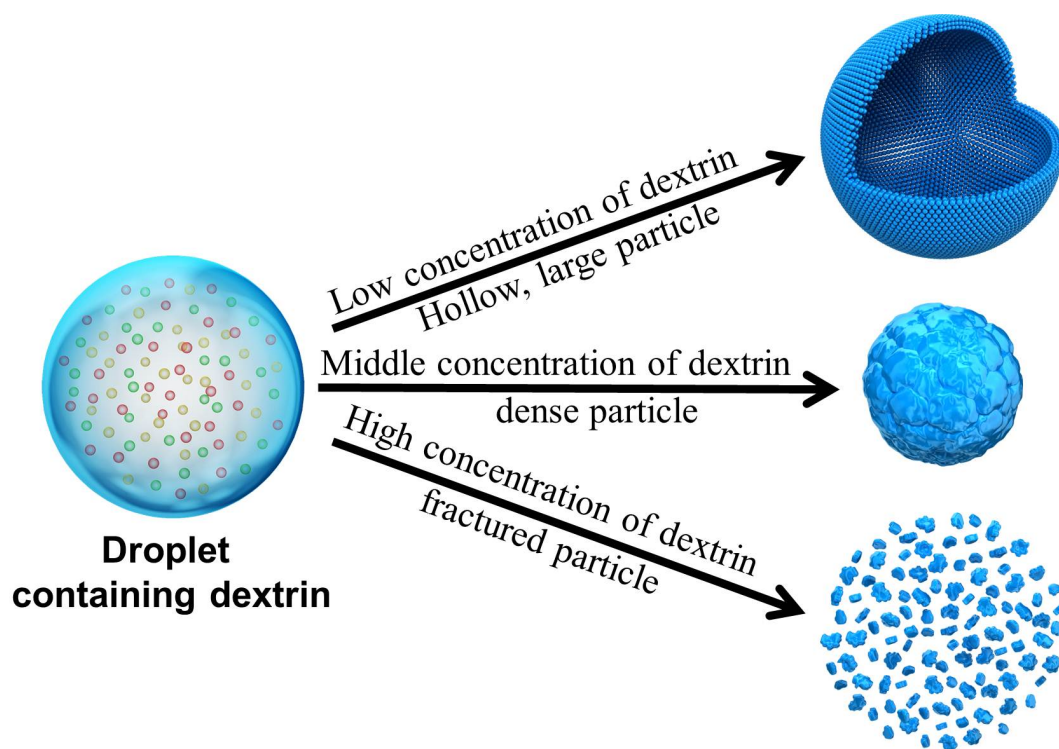

**Scheme S1.** Formation mechanism of solid, hollow, and nano-sized  $\text{Zn}_2\text{SiO}_4:\text{Mn}$  powders prepared from the solutions with different concentration of dextrin.

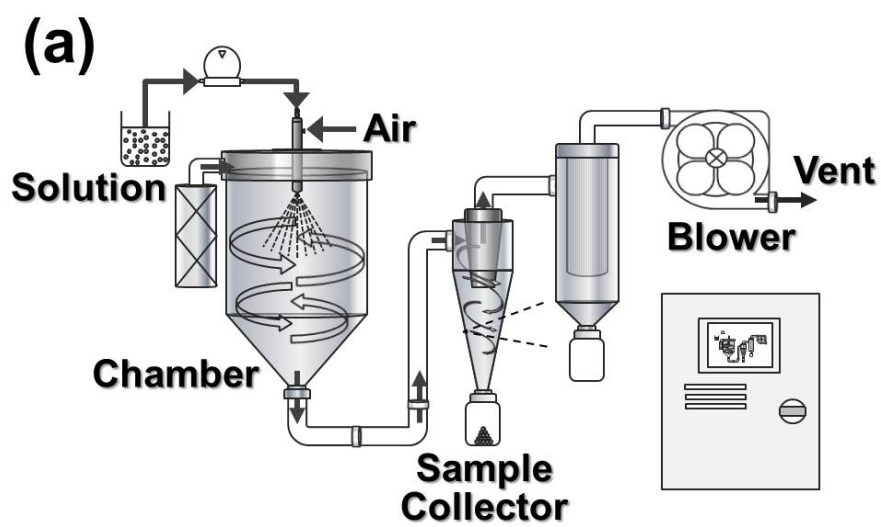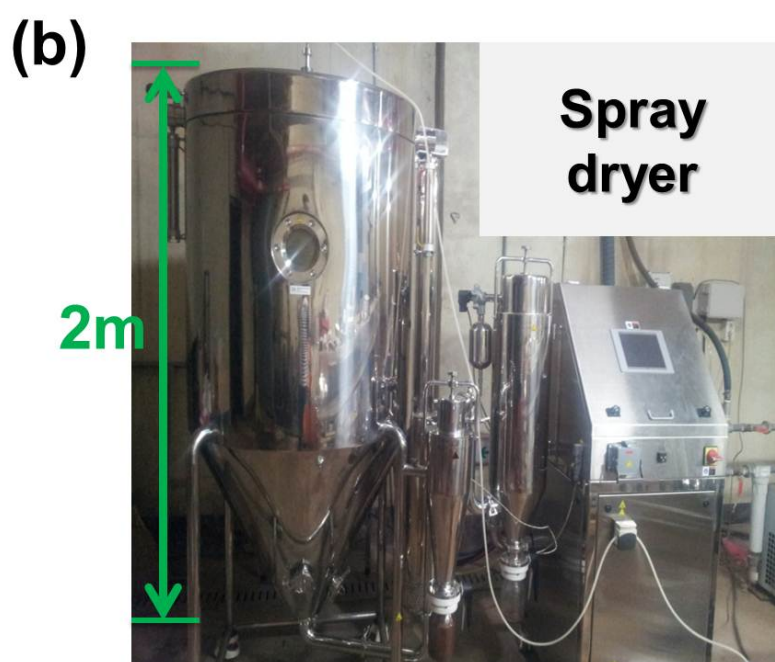

**Figure S4.** Schematic diagram and digital photo of spray dryer applied in the preparation of precursor powders.
